# Supplementary material for: Evaluation of a Dietary Supplementation Combining Protein and a Pomegranate Extract in Older People: A Safety Study
Source: MDPI journal article supplement (doi:10.3390/nu14235182), 2022-12-06
Supplement: s1 [file s1]

**Supplementary Table 1.** Individual compliance (%) in the Control and Test group

| <b>Test (n=14)</b> |              | <b>Control (n=15)</b> |              |
|--------------------|--------------|-----------------------|--------------|
| S1                 | 98.3         | S2                    | 95.5         |
| S5                 | 107.8        | S3                    | 100.4        |
| S6                 | 107.8        | S4                    | 106.1        |
| S7                 | 104.0        | S9                    | 109.8        |
| S12                | 95.0         | S10                   | 98.2         |
| S13                | 104.8        | S11                   | 98.7         |
| S14                | 100.4        | S16                   | 94.7         |
| S18                | 102.0        | S17                   | 100.4        |
| S21                | 94.3         | S19                   | 103.1        |
| S22                | 101.2        | S20                   | 90.0         |
| S23                | 100.1        | S24                   | 99.5         |
| S25                | 100.6        | S27                   | 99.3         |
| S26                | 96.7         | S28                   | 112.4        |
| S30                | 86.4         | S29                   | 104.8        |
|                    |              | S31                   | 87.0         |
| <b>Mean</b>        | <b>100.0</b> |                       | <b>100.0</b> |
| <b>SD</b>          | <b>5.7</b>   |                       | <b>6.8</b>   |
